1 **Title:** Destructive disinfection of infected brood prevents systemic disease spread in  
2 ant colonies

3

4 **Short title:** Colony-level disease protection in ants

5

6 **Authors:** Christopher D. Pull<sup>1\*</sup>, Line V. Ugelvig<sup>1,†</sup>, Florian Wiesenhofer<sup>1</sup>, Simon

7 Tragust<sup>1,2,‡</sup>, Thomas Schmitt<sup>3</sup>, Mark J.F. Brown<sup>4</sup>, Sylvia Cremer<sup>1\*</sup>

8

9 **Affiliations:**

10 <sup>1</sup>IST Austria (Institute of Science and Technology Austria), 3400 Klosterneuburg,

11 Austria

12 <sup>2</sup>Evolution, Genetics and Behaviour, University of Regensburg, 93040 Regensburg,

13 Germany

14 <sup>3</sup>Department of Animal Ecology and Tropical Biology, University of Würzburg,

15 97974 Würzburg, Germany

16 <sup>4</sup>School of Biological Sciences, Royal Holloway University of London, Egham,

17 Surrey, TW20 0EX, UK

18 \*Corresponding authors: Christopher D. Pull ([cpull@ist.ac.at](mailto:cpull@ist.ac.at)), Sylvia Cremer

19 ([sylvia.cremer@ist.ac.at](mailto:sylvia.cremer@ist.ac.at))

20 † Current address: Centre for Social Evolution, Department of Biology, University of

21 Copenhagen, 2100 Copenhagen, Denmark

22 ‡ Current address: Animal Ecology I, University of Bayreuth, 95447 Bayreuth,

23 Germany

24

25 **Abstract**

26 Social insects protect their colonies from infectious disease through collective  
27 defences that result in social immunity. In ants, workers first try to prevent infection  
28 of colony members. Here, we show that if this fails and a pathogen establishes an  
29 infection, ants employ an efficient multicomponent behaviour – "destructive  
30 disinfection" – to prevent further spread of disease through the colony. Ants  
31 specifically target infected pupae during the pathogen's non-contagious incubation  
32 period, relying on chemical 'sickness cues' emitted by pupae. They then remove the  
33 pupal cocoon, perforate its cuticle and administer antimicrobial poison, which enters  
34 the body and prevents pathogen replication from the inside out. Like the immune  
35 system of a body that specifically targets and eliminates infected cells, this social  
36 immunity measure sacrifices infected brood to stop the pathogen completing its  
37 lifecycle, thus protecting the rest of the colony. Hence, the same principles of disease  
38 defence apply at different levels of biological organisation.

39

40 **Introduction**

41 Pathogen replication and transmission from infectious to susceptible hosts is key to  
42 the success of contagious diseases [1]. Social animals are therefore expected to  
43 experience a greater risk of disease outbreaks than solitary species, because their  
44 higher number of within-group interactions will promote pathogen spread [2–4]. As a  
45 consequence, traits that mitigate this cost should have been selected for in group-  
46 living animals as an essential adaptation to social life [5,6].

47

48 Eusocial insects (termites, ants and the social bees and wasps) live in complex  
49 societies that are ecologically successful and diverse. They are typically single-family

50 colonies comprising one or a few reproducing queens and many sterile workers. Both  
51 of these castes are highly interdependent: the queens are morphologically specialised  
52 for reproduction and cannot survive without the assistance of the workers; conversely,  
53 the workers cannot reproduce, but gain inclusive fitness by raising the queen's  
54 offspring [7]. Consequently, social insects societies have become single reproductive  
55 units, where natural selection acts on the colony instead of its individual members  
56 [8,9]. This has parallels to the evolution of complex multicellular organisms, where  
57 sterile somatic tissue and germ line cells form a single reproducing body. Hence,  
58 social insect colonies are often termed “superorganisms” and their emergence is  
59 considered a major evolutionary transition [8–11]. Since evolution favours the  
60 survival of the colony over its members, selection has resulted in a plethora of  
61 cooperative and altruistic traits that workers perform to protect the colony from harm  
62 [5,8,12,13]. In particular, social insects have evolved physiological and behavioural  
63 adaptations that limit the colony-level impact of infectious diseases, which could  
64 otherwise spread easily due to the intimate social interactions between colony  
65 members [12,14–16]. These defences are performed collectively by the workers and  
66 form a layer of protection known as “social immunity” that, like the immune system  
67 of a body, protects the colony from invading pathogens [12,17].

68

69 Our understanding of how social immunity functions is based mostly on the first line  
70 of defence that reduces the probability of pathogen exposure and infection. It is well  
71 known for example that social insects avoid pathogens, like fungal spores, in their  
72 environment, and perform sanitary care when nestmates come into contact with them  
73 [18–22]. In ants, sanitary care involves grooming and the use of antimicrobial  
74 secretions to mechanically remove and chemically disinfect the pathogen, reducing

75 the likelihood that pathogen exposure leads to the development of an infection  
76 [21,22]. However, what happens when sanitary care fails and a pathogen successfully  
77 infects an ant, with the consequent potential to create an epidemic, remains poorly  
78 understood. In a body, infected cells are eliminated by the immune system to prevent  
79 the proliferation and systemic spread of pathogens through the tissue. Since infected  
80 ants become highly contagious to their nestmates [23,24], we hypothesised that they  
81 should have evolved an analogous mechanism to detect and contain lethal infections  
82 in individuals as early as possible, to prevent disease outbreaks in the colony.

83

84 To test this hypothesis, we exposed pupae of the invasive garden ant, *Lasius*  
85 *neglectus*, to a generalist fungal pathogen, *Metarhizium brunneum*. When the  
86 infectious conidiospores of this fungus come into contact with insect cuticle, they  
87 attach, germinate and penetrate the host cuticle within 48 h to cause internal  
88 infections. After a short, non-infectious incubation period of a few days, a successful  
89 fungal infection then induces host death, after which the fungus replicates and  
90 releases millions of new infectious conidiospores in a process called sporulation  
91 [23,25]. Previous work found that brood infected with *Metarhizium* is removed from  
92 the brood chamber, however, it is unknown how the ants then respond to the infection  
93 [26,27]. Here we demonstrate that ants detect infected pupae during the pathogen's  
94 non-infectious incubation period and react by performing a multicomponent  
95 behaviour. To investigate this response we used a series of behavioural and chemical  
96 experiments to determine its function and underlying mechanisms. Finally, we tested  
97 the impact of the multicomponent behaviour on the pathogen's ability to complete its  
98 lifecycle and cause a systemic colony infection.

99

100 **Results**

101 **Destructive disinfection of lethally infected pupae**

102 We exposed ant pupae to one of either three dosages of *Metarhizium* conidiospores or  
103 a sham control. We observed that ants tending pathogen-exposed pupae prematurely  
104 removed the pupae from their cocoons in a behaviour we termed “unpacking”,  
105 whereas control pupae were left cocooned (Fig 1A-B, Video S1; Cox proportional  
106 hazards regression: likelihood ratio test (LR)  $\chi^2 = 55.48$ ,  $df = 3$ ,  $P = 0.001$ ; post hoc  
107 comparisons: control vs. low,  $P = 0.004$ ; low vs. medium,  $P = 0.006$ ; medium vs. high  
108 = 0.024; all others,  $P = 0.001$ ). Unpacking occurred between 2-10 d after pathogen  
109 exposure, but sooner and more frequently at higher conidiospore dosages (Fig 1B). As  
110 unpacking was a belated response to pathogen exposure and we were unable to  
111 remove any conidiospores from the cocoon or the unpacked pupae (Fig S1), we  
112 concluded that the ants were not performing unpacking to simply dispose of the  
113 contaminated cocoons. Instead, we postulated that unpacking was a response to  
114 successful infection. At the time of unpacking, the majority of pupae were still alive  
115 (Fig S2) and fungal outgrowth had not yet occurred (Fig 1F). Hence, to test if the ants  
116 were reacting to early-stage infections, we removed both unpacked and non-unpacked  
117 pathogen-exposed cocooned pupae from the ants and incubated them under optimal  
118 conditions for fungal outgrowth. We found that, on average across the conidiospore  
119 dosages, 90% of unpacked pupae harboured infections that sporulated in the absence  
120 of the ants. In contrast, only 25% of non-unpacked pupae were infected (generalised  
121 linear model [GLM]: overall LR  $\chi^2 = 21.52$ ,  $df = 3$ ,  $P = 0.001$ ; cocooned vs. unpacked  
122 pupae: LR  $\chi^2 = 18.5$ ,  $df = 1$ ,  $P = 0.001$ ; conidiospore dose: LR  $\chi^2 = 0.42$ ,  $df = 2$ ,  $P =$   
123 0.81). We therefore concluded that the ants were detecting and unpacking pupae with  
124 lethal infections during the asymptomatic incubation period of the pathogen’s

125 lifecycle. At this time point the fungus is non-infectious and so there is no risk of the  
126 ants contracting the disease.

127

128 Next, we filmed ants presented with pathogen-exposed pupae and compared their  
129 behaviour before and after unpacking. Prior to unpacking, we observed the typical  
130 sanitary care behaviours reported in previous studies [20,22,23,28]. Namely, the ants  
131 groomed the pupae (Fig 1C), which has the dual function of removing the  
132 conidiospores and applying the ants' antimicrobial poison [22]. In *L. neglectus*, the  
133 poison is mostly formic acid and is emitted from the acidopore at the abdominal tip,  
134 where the ants actively suck it up and transiently store it in their mouths until  
135 application during grooming. Additionally, the ants can spray their poison directly  
136 from the acidopore; yet, this behaviour is rarely expressed during sanitary care (about  
137 once every 28 h; Fig 1D) [22]. However, after unpacking, we observed a set of  
138 behaviours markedly different to sanitary care (Fig 1A, Video S1). The ants sprayed  
139 the pupae with poison from their acidopore approx. 15-times more frequently than  
140 during sanitary care (~ 13-times/d; Fig 1D; generalised linear mixed model [GLMM]:  
141 LR  $\chi^2 = 17.04$ , df = 1,  $P = 0.001$ ), and increased grooming by 50% (Fig 1C; linear  
142 mixed effects regression [LMER]: LR  $\chi^2 = 145.26$ , df = 1,  $P = 0.001$ ). Given that  
143 there was no fungus to remove at the time of unpacking, the increase in grooming  
144 probably functioned solely to apply poison from the oral store [22]. Furthermore, the  
145 ants repeatedly bit the pupae to make perforations in their cuticles (Fig 1E; GLMM:  
146 LR  $\chi^2 = 39.44$ , df = 1,  $P = 0.001$ ). Together these three behaviours resulted in the  
147 death of the pupae and left their corpses heavily damaged and coated in the ants'  
148 poison (Fig 1G, Fig S2, Fig S3). Accordingly, we named the combination of

149 unpacking, grooming, poison spraying and biting “destructive disinfection”, and  
150 performed a series of experiments to determine its function.

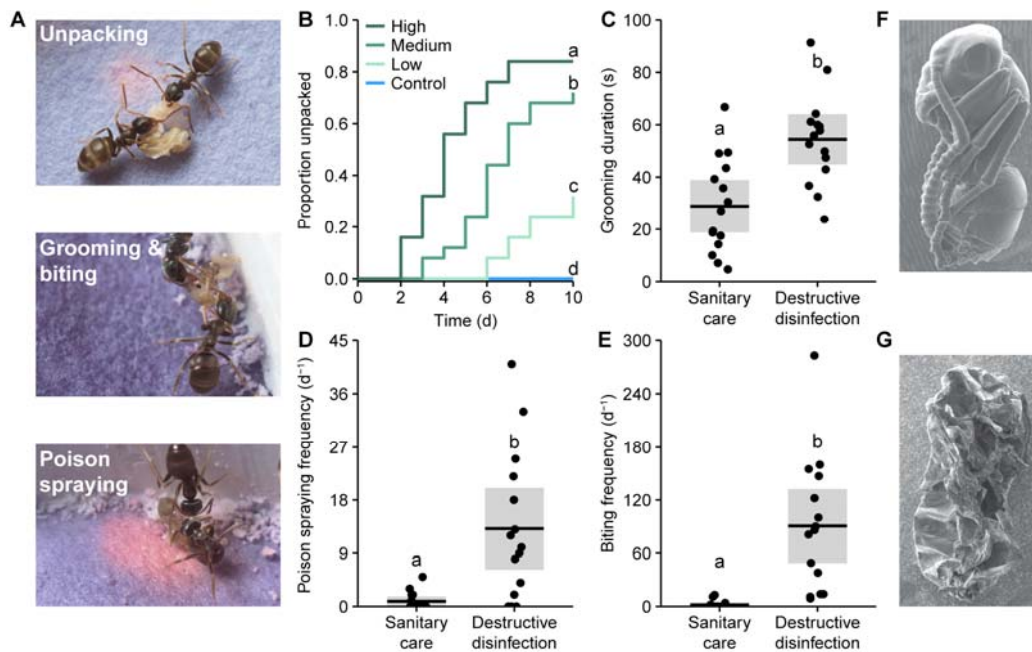

151

152 **Fig 1. Ants perform destructive disinfection in response to lethal fungal**  
153 **infections of pupae.**

154 (A) Destructive disinfection starts with the unpacking of pupae from their cocoons  
155 and is followed by grooming, poison spraying and biting (ants housed on blue pH-  
156 sensitive paper to visualise acidic poison spraying, which shows up pink). (B)  
157 Unpacking occurred significantly more in pupae exposed to fungal conidiospores and  
158 was dose-dependent, occurring sooner and in higher amounts as the dose of  
159 conidiospores increased (letters denote groups that differ significantly in Tukey post  
160 hoc comparisons [ $P < 0.05$ ]). (C-E) Comparison of the ants' behaviour between  
161 sanitary care and destructive disinfection. Destructive disinfection is characterised by  
162 increases in grooming duration, poison spraying frequency and biting frequency (all  
163 data points displayed; lines  $\pm$  shaded boxes show mean  $\pm$  95% confidence intervals  
164 [CI]; letters denote groups that differ significantly in logistic regressions [ $P < 0.05$ ]).

165 (F) Scanning electron micrographs (SEM) of an asymptomatic pupa immediately after  
166 unpacking, and (G) of a destructively disinfected pupa 24 h later.

167

### 168 **Chemical detection of internal infections**

169 Firstly, we wanted to know how the ants identify internal infections during the  
170 pathogen's non-contagious incubation period, when pupae were still alive and showed  
171 no external signs of disease. As ants use chemical compounds on their cuticles to  
172 communicate complex physiological information to nestmates [29], we speculated  
173 that infected pupae may produce olfactory sickness cues. We washed infected pupae  
174 in pentane solvent to reduce the abundance of their cuticular hydrocarbons (CHCs).  
175 When pentane-washed pupae were presented to ants, there was a 72% reduction in  
176 unpacking compared to both non- and water-washed infected pupae (Fig 2A; GLM:  
177 LR  $\chi^2 = 12.2$ ,  $df = 2$ ,  $P = 0.002$ ; Tukey post hoc comparisons: water-washed vs. non-  
178 washed,  $P = 0.79$ ; all others,  $P = 0.009$ ). As pentane-washed pupae had lower  
179 abundances of CHCs (Fig S4), this result indicates that the ants use one or more  
180 cuticle compounds to detect the infections.

181

182 Gas chromatography-mass spectrometry (GC-MS) analysis of the solvent wash  
183 confirmed that unpacked pupae have distinct chemical profiles compared to non-  
184 infected control pupae, whilst cocooned (non-unpacked) pathogen-exposed pupae  
185 were intermediate (Fig 3B, Fig S5; perMANOVA:  $F = 1.49$ ,  $df = 46$ ,  $P = 0.002$ ; post  
186 hoc perMANOVA comparisons: unpacked vs. control,  $P = 0.003$ ; unpacked vs.  
187 cocooned,  $P = 0.79$ ; cocooned vs. control,  $P = 0.08$ ). Most chemical messages in  
188 social insects are encoded by quantitative shifts of several compounds [29].  
189 Correspondingly, we found that 8 out of the 24 CHCs identified (Table S1) had higher



190 relative abundances on unpacked pupae compared to control pupae (Fig 3C-F, Fig S5;  
191 all Kruskal-Wallis [KW] test statistics and post hoc comparisons in Table S2).  
192 Moreover, four of these CHCs were also present in relatively higher quantities on  
193 unpacked pupae compared to the non-unpacked cocooned pupae. Hence, several  
194 specific CHCs probably accumulate on infected pupae over time, eventually reaching  
195 an amount that, relative to the other compounds, is sufficient to elicit destructive  
196 disinfection. This corresponds to current models of social insect behaviour, where the  
197 likelihood of a response depends on stimuli exceeding a certain threshold [30,31].  
198 Interestingly, the four CHCs specifically increased on unpacked pupae were all long-  
199 chained CHCs (carbon chain length  $C_{33-35}$ ) with a low volatility, meaning that the ants  
200 have to be close to or touching the pupae to detect them [32]. As ants keep pupae in  
201 large piles, using low-volatility CHCs may be important so that the ants accurately  
202 identify the sick pupae and do not mistakenly destroy healthy ones.

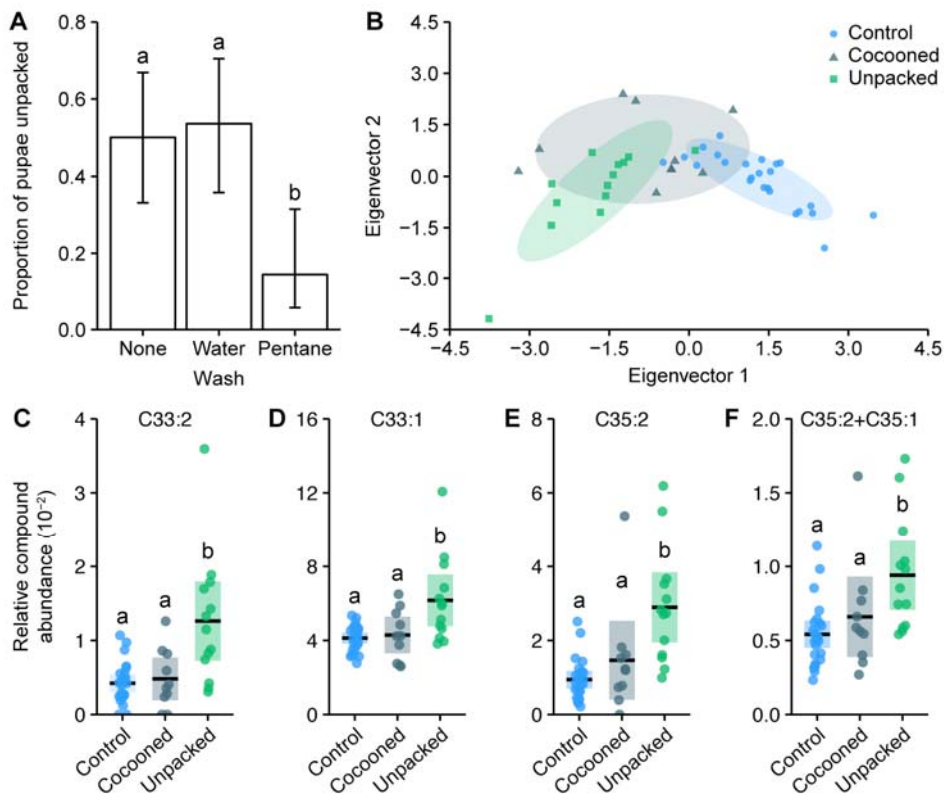

203

204 **Fig 2. Destructive disinfection is induced by changes in the chemical profile of**  
205 **infected pupae.**

206 (A) Pupae washed in pentane solvent to reduce the abundance of their cuticular  
207 hydrocarbons (CHCs) were unpacked less than unwashed or water-washed pupae  
208 (positive and handling controls, respectively; error bars show  $\pm$  95% CI; letters  
209 specify significant Tukey post hoc comparisons [ $P < 0.05$ ]). (B) Unpacked pathogen-  
210 exposed pupae have distinct chemical profiles compared to sham-treated control  
211 pupae. Pathogen-exposed pupae that were not unpacked (cocooned group) have  
212 intermediate profiles (axes show discriminant analysis of principle components  
213 eigenvectors). (C-F) The four CHCs with higher relative abundances on unpacked  
214 pupae compared to both control and cocooned pupae, (C) Tritriacontadiene, C33:2  
215 (D), Tritriacontene, C33:1 (E), Pentatriacontadiene, C35:2 (F) co-eluting  
216 Pentatriacontadiene and Pentatriacontene, C35:2+C35:1 (all data points displayed;  
217 line  $\pm$  shaded box show mean  $\pm$  95% CI; letters specify groups that differ significantly  
218 in KW test post hoc comparisons [ $P < 0.05$ ]).

219

220 **Destructive disinfection prevents pathogen replication**

221 We next tested if destructive disinfection prevents pupal infections from replicating  
222 and becoming infectious. Pathogen-exposed pupae were kept with groups of ants (8  
223 ants per pupae per group) until unpacking. They were then left with the ants for a  
224 further 1 or 5 d before being removed and incubated for fungal growth. We compared  
225 the number that subsequently sporulated to pathogen-exposed pupae kept without  
226 ants. Whilst 90% of pupae contract infections, destructive disinfection significantly  
227 reduced the proportion of pupae that sporulated and hence became infectious (Fig 3A;  
228 GLM: LR  $\chi^2 = 40.47$ , df = 2,  $P = 0.001$ ; Tukey post hoc comparisons: 1 vs. 5 d,  $P =$

229 0.04; all others,  $P = 0.001$ ). After only 1 d, the number of destructively disinfected  
230 pupae that sporulated decreased by 65%. With more time, the ants could reduce the  
231 number of pupae sporulating even further by 95%. Since the pupae were removed  
232 from the ants for fungal incubation, we can conclude that destructive disinfection  
233 permanently prevents pathogen replication. We repeated this experiment with a  
234 smaller number of ants (3 ants per pupae per group) to investigate how group size  
235 influences the success of destructive disinfection. Smaller groups of ants were less  
236 efficient than larger ones: although they could still inhibit > 90% of pupal infections  
237 within 5 d of unpacking, pupae tested for infection after 1 d still sporulated 70% of  
238 the time (Fig S6; GLM: LR  $\chi^2 = 35.23$ ,  $P = 0.001$ ; Tukey post hoc comparisons: 0 vs.  
239 1 d,  $P = 0.2$ ; 0 vs. 5 d,  $P = 0.001$ ; 1 vs. 5 d,  $P = 0.002$ ). As the effectiveness of  
240 destructive disinfection increased with the amount of time the ants had, as well as  
241 with the number of ants present, we inferred that there must be a limiting factor  
242 affecting the inhibition the pathogen.

243

244 To study the underlying mechanisms of destructive disinfection, we performed its  
245 different components – unpacking, biting and poison spraying – *in vitro* to test for  
246 their relative importance and potential synergistic effects. We simulated unpacking by  
247 removing the cocoons of the pupae manually, and the cuticle damage caused by biting  
248 using forceps. Previous work establishing the composition of *L. neglectus* poison [22]  
249 allowed us to create a synthetic version for use in this experiment (60% formic acid  
250 and 2% acetic acid, in water; applied at a dose equivalent to what ants apply during  
251 destructive disinfection; Fig S8), with water as a sham control. We then performed  
252 these ‘behaviours’ in different combinations in a full-factorial experiment. We found  
253 that all three behaviours must be performed in the correct order and interact to prevent

254 pathogen replication (overview graph showing odds ratios of sporulation in Fig 3B,  
255 full data dataset displayed in Fig S7; GLM: overall LR  $\chi^2 = 79.9$ ,  $df = 5$ ,  $P = 0.001$ ;  
256 interaction between behaviours LR  $\chi^2 = 20.6$ ,  $df = 2$ ,  $P = 0.001$ ; all post hoc  
257 comparisons in Table S3). As in sanitary care, the poison was the active antimicrobial  
258 compound that inhibited fungal growth (Fig S7, Table S3 [21,22]). However, for the  
259 poison to function the pupae had to be removed from their cocoons and their cuticles  
260 damaged. Firstly, this is because the cocoon itself is hydrophobic and thus prevents  
261 the aqueous poison from reaching the pupae inside (Fig S9). Secondly, as the  
262 infection is growing internally at the time of unpacking, the cuticle must be broken in  
263 order for the poison to enter the hemocoel of the pupae. This is achieved with the  
264 perforations created by the ants biting the pupal cuticle. As the active antimicrobial  
265 component, we concluded that the poison is probably the limiting factor determining  
266 whether destructive disinfection is successful. Because the poison has a slow  
267 biosynthesis and each ant can only store a limited amount [22,33], it would explain  
268 why destructive disinfection was more likely to be successful the longer the ants had  
269 to treat the pupae, and as the number of ants increased (Fig 3A, Fig S6). By sharing  
270 the task of poison synthesis and application, the ants probably increase their chances  
271 of preventing the pathogen becoming infectious.

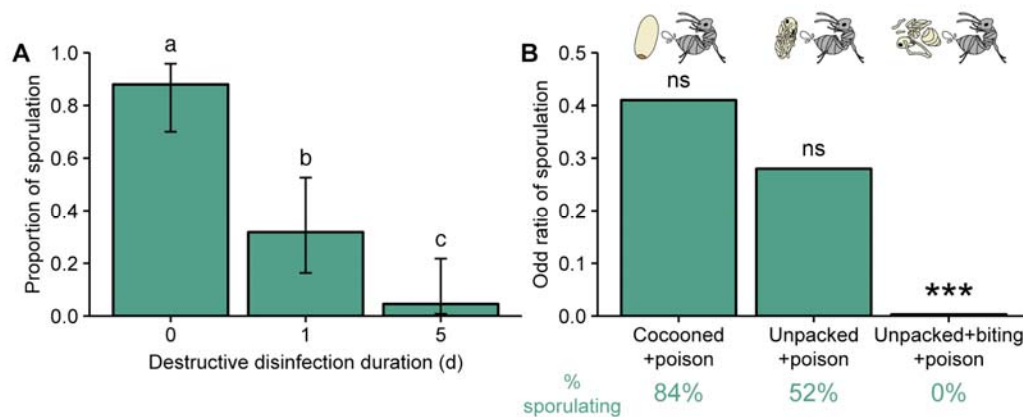

272

273 **Fig 3. Destructive disinfection by ants prevents pathogen replication.**

274 (A) Destructive disinfection greatly reduced the probability of pupae sporulating  
275 compared to pupae that received no destructive disinfection (time point 0), and its  
276 effectiveness increased with the length of time ants could perform destructive  
277 disinfection (1 vs. 5 d; error bars show  $\pm$  95% CI; letters denote groups that differ  
278 significantly in Tukey post hoc comparisons [ $P < 0.05$ ]). (B) The individual  
279 components of destructive disinfection (unpacking, biting and poison spraying)  
280 interacted to inhibit pathogen replication (% of pupae sporulating in each treatment  
281 shown under graph in green). The odds of sporulation for cocooned and unpacked  
282 pupae treated with poison were not significantly different to those of control pupae  
283 (cocooned pupae treated with water). But when unpacking, biting and poison spraying  
284 were combined the odds of sporulation were significantly reduced (logistic regression;  
285 ns = non-significant deviation from control, \*\*\* =  $P < 0.001$ ; complete data set of full  
286 factorial experiment displayed in Fig S7 and all statistics in Table S3).

287

### 288 **Disruption of the pathogen lifecycle stops disease transmission**

289 Finally, we investigated the impact of destructive disinfection on disease transmission  
290 within a social host group. We created mini-nests comprising two chambers and a  
291 group of ants (5 ants per group). Into one of the chambers we placed an infectious  
292 sporulating pupa – simulating a failure of the ants to detect and destroy the infection –  
293 or a pupa that had been destructively disinfected, and was thus non-infectious. The  
294 ants groomed, moved around and sprayed both types of corpses with poison. In the  
295 case of the sporulating pupae, all conidiospores were removed from the corpse by the  
296 ants. As in previous studies, sporulating corpses were highly virulent [23,24] and  
297 caused lethal infections that became contagious after host death in 42% of ants (Fig  
298 4A). However, there was no disease transmission from destructively disinfected pupae

299 (Fig 4A; GLM: LR  $\chi^2 = 31.32$ , df = 1,  $P = 0.001$ ). We therefore concluded that by  
300 preventing the pathogen from completing its lifecycle destructive disinfection stops  
301 intra-colony disease transmission (Fig 4B).

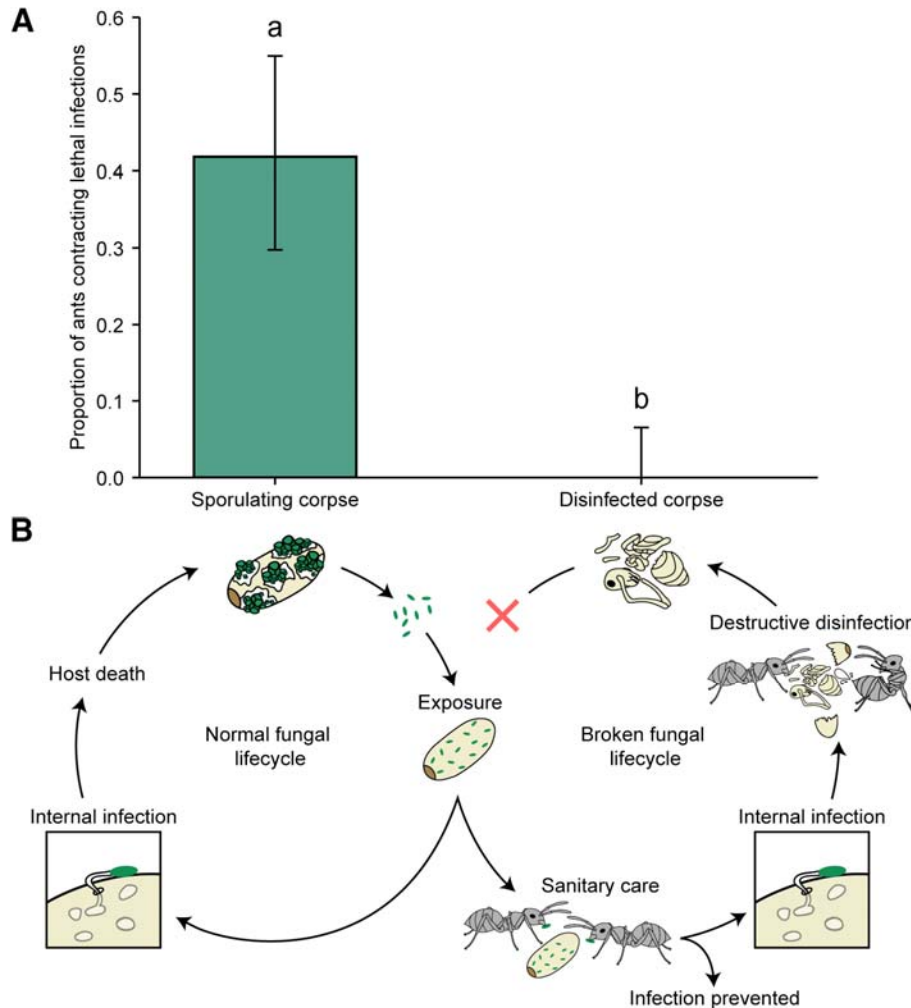

302

303 **Fig 4. Destructive disinfection stops disease transmission.**

304 (A) Ants that interacted with sporulating pupae contracted lethal infections and died  
305 from fungal infection in 42% of the cases, whilst there was no disease transmission  
306 from destructively disinfected pupae (error bars show  $\pm$  95% CI; letters denote groups  
307 that differ significantly in a logistic regression [ $P < 0.05$ ]). (B) Overview of normal  
308 fungal lifecycle resulting in infectious, sporulating corpses (left) and a broken  
309 lifecycle due to the interference of the ants (right). When sanitary care fails to prevent

310 infection in pathogen-exposed individuals, the ants switch to colony-level disease  
311 control, i.e. destructive disinfection to stop pathogen replication, resulting in non-  
312 infectious corpses.

313

## 314 **Discussion**

315 Ants are extremely hygienic and frequently perform sanitary behaviours to prevent  
316 microbial infection of themselves and colony members [12]. However, if these  
317 behaviours fail, the colony faces a problem because infections can become highly  
318 contagious and cause disease outbreaks [23,24]. In this study, we have characterised a  
319 multicomponent behaviour that ants use to fight lethal infections of a common fungal  
320 pathogen. Our results show that ants detect infected pupae using chemical signatures  
321 whilst the pathogen is still in its non-transmissible incubation period (Fig 2). In  
322 contrast to the simple removal of infected brood in honeybees [15], the ants then  
323 performed destructive disinfection, utilising their antimicrobial poison for internal  
324 disinfection of the host body to stop the pathogen from replicating and completing its  
325 lifecycle (Fig 1, Fig 3). Ultimately, this prevented the fungus from infecting new hosts  
326 and effectively reduced its fitness to zero (Fig 4). These findings extend our current  
327 understanding of collective disease defence in ants, showing that they not only avoid  
328 [18], groom [20–22] and isolate pathogens [22,26], but can even interfere with the  
329 infectious cycle of the pathogen to actively arrest its establishment and replication in  
330 the colonies (Fig 4b). This will have important implications for the evolution of host-  
331 pathogen interactions in social insects, as the pathogen is unable to reproduce. More  
332 generally, our results reveal the remarkable adaptations that can evolve in  
333 superorganisms to avoid disease outbreaks.

334

335 We found that destructive disinfection acts like a second line of defence for the  
336 colony, when the first, sanitary care, fails to prevent infection. This has parallels to the  
337 immune system of the body where defences are layered to prevent pathogen  
338 establishment and replication at multiple levels [17]. The first line of defence in the  
339 body is made up of mechanical and chemical defences, such as ciliated cells in the  
340 lung that move pathogens trapped in mucus out of the body [17]. In ants, grooming  
341 and chemical disinfection during sanitary care play an analogous role [20–22].  
342 However, if a pathogen circumvents these defences and a cell is infected, the second  
343 line of defence is often a targeted elimination of the cell. This starts with immune  
344 cells detecting an infection and then transporting cell death-inducing and  
345 antimicrobial compounds into the infected cell by creating pores in its membrane [34–  
346 36]. Likewise, our experiments revealed that ants detect sick pupa using chemical  
347 compounds on their cuticle. They then unpack the pupa and make perforations in its  
348 cuticle, enabling the ants to spray their poison directly into the pupa's body. In both  
349 cases, the second line of defence destroys the infected cell/insect, along with the  
350 infection, to prevent transmission [37]. Since the loss of somatic cells and individual  
351 insect workers can be tolerated with negligible effects on fitness [17], these analogous  
352 strategies are a unique way to clear infections and avoid any further damage to the  
353 body and colony, respectively.

354

355 Previous studies have suggested that ants might use chemical cues to detect sick  
356 colony members, but evidence to support this hypothesis has been lacking [26,38,39].  
357 To our knowledge, we have therefore discovered the first known instance of ants  
358 using chemical information to identify and specifically target infected individuals.  
359 The chemical compounds with increased abundances on infected pupae are distinct



360 from those that induce the removal of corpses in ants [40–42], and, like in tapeworm-  
361 infected ants [43], are not pathogen-derived because they are also present in lower  
362 amounts on healthy pupae. This alteration of the hosts' chemical profile may arise  
363 during infection from the breakdown of hydrocarbons by *Metarhizium* penetration  
364 [44] or after infection due to an immune response affecting the synthesis of specific  
365 hydrocarbons [45,46]. The latter is more likely as the ants only display destructive  
366 disinfection once the fungus is growing inside the pupae. Interestingly, two of the four  
367 CHCs that were increased on infected pupae also had higher abundances on virus-  
368 infected honeybees (Tritriacontadiene [47]) and their brood experiencing a simulated  
369 bacterial infection (Tritriacontene [46]). As these compounds belong to the same  
370 hydrocarbon substance class – unsaturated hydrocarbons – their common biosynthetic  
371 pathway might be upregulated upon infection. This raises the possibility that these  
372 hydrocarbons are evolutionarily conserved sickness cues in Hymenopteran social  
373 insects. Such cues may have evolved into general sickness signals in social insects as  
374 they alert nestmates to the presence of an infection that will harm the colony if it  
375 spreads [48]. Similar to the “find-me/eat-me” signals expressed by infected cells in a  
376 body [49,50], they will be selected for as they enhance colony fitness by preventing a  
377 systemic infection. Hence, altruistic displays of sickness can evolve in  
378 superorganisms, even if this results in the destruction of the individual that expresses  
379 them.

380

381 It is well established that social insects use glandular secretions with antimicrobial  
382 properties as external surface disinfectants [51]. However, because these compounds  
383 can also harm the host, they should be used with caution inside the colony. For  
384 example, the acidic poison *L. neglectus* and other Formicine ants produce is extremely

385 caustic and is used to attack conspecifics [22,33,52]. During sanitary care they apply  
386 this poison via grooming because it is probably more accurate and less wasteful than  
387 spraying [22]. Moreover, as pathogen-exposed insects typically survive when they  
388 receive sanitary care [20–23], conservatively applying the poison may also reduce the  
389 damage it causes to individuals that can then continue contributing to the colony. This  
390 is supported by our observation that *L. neglectus* will apply large quantities of poison  
391 onto pupae only when they become infected. Remarkably, we found that, in addition  
392 to being external disinfectants, ants use antimicrobial secretions as internal  
393 disinfectants against infections within the bodies of nestmates. Since infected pupae  
394 are moribund there is no risk that the ants' poison is harming individuals with a future  
395 role in the colony. Taken together, these observations suggest that ants adjust their  
396 behaviours in response to the risk presented to the colony. It would be interesting to  
397 explore further how social immunity defences are regulated to prevent collateral  
398 damage, or 'social immunopathology', within the colony.

399

400 Our experiments show that destructive disinfection was highly effective and  
401 prevented 95% of infections becoming transmissible. Destructive disinfection will  
402 thus keep the average number of secondary infections caused by an initial infection  
403 small and the disease will die out within the colony [3]. This may explain why  
404 infections of *Metarhizium* and other generalist entomopathogenic fungi like  
405 *Beauveria*, though common in the field [53–56], do not seem to cause colony-wide  
406 epidemics in ants, but are more numerous in solitary species that lack social immunity  
407 [57–59]. Behaviours like destructive disinfection that are able to reduce pathogen  
408 fitness to zero could have selected for host manipulation in fungi that specialise on  
409 infecting ants, e.g. *Ophiocordyceps* and *Pandora* [60-62]. These fungi force their ant

410 hosts to leave the nest and climb plant stems near foraging trails. There they die and  
411 become infectious, releasing new spores that infect ants foraging below. However,  
412 ants infected with *Ophiocordyceps* that were experimentally placed back into the nest  
413 disappeared [61]. Our study suggests that these ants could have been eliminated  
414 through destructive disinfection. Consequently, ant-specialist fungi like  
415 *Ophiocordyceps* and *Pandora* may have evolved host manipulation as a means to  
416 complete their lifecycle outside of the nest and avoid destructive disinfection [61,62].  
417 In contrast to specialists, generalist pathogens like *Metarhizium* infect a broad range  
418 of solitary and social hosts, making it less likely that they evolve strategies to escape  
419 social immunity defences [63]. Future work that investigates how social immunity  
420 disrupts typical host-pathogen dynamics will shed light on the co-evolution of  
421 pathogens and their social hosts [3].

422

423 Destructive disinfection has probably evolved in ants because the removal of corpses  
424 from the colony alone does not guarantee that disease transmission is prevented [61].  
425 This is because ants place corpses onto midden (trash) sites that are located inside or  
426 outside near the nest and regularly visited by midden workers [64–66]. Consequently,  
427 midden sites represent a potential source for disease transmission back into the  
428 colony. In contrast to ants, honeybees have no middens and corpses are dumped  
429 randomly outside of the hive [15]. But because honeybees forage on the wing, it is  
430 unlikely that corpses are re-encountered and so removal is sufficient to prevent  
431 disease transmission [67]. Termites on the other hand perform a different behaviour,  
432 whereby the dead are cannibalised [19,68]. Cannibalism is effective because the  
433 termite gut neutralises ingested pathogens [69–71] and has likely evolved because  
434 dead nestmates are a source of valuable nitrogen in their cellulose-base diet [72]. The

435 same selective pressure has driven this suite of independently evolved innovations –  
436 the need to eliminate or remove infected individuals early in the infectious cycle –  
437 with the ants expressing a particularly complex behavioural repertoire. This seems to  
438 be a general principle in disease defence as cells are also rapidly detected and  
439 destroyed shortly after infection to prevent pathogen spread in multicellular organisms  
440 [17]. Understanding how natural selection can result in similar traits at different levels  
441 of biological organisation and in organisms with different life histories is a central  
442 question in evolutionary biology [8]. Studying the similarities and differences  
443 between organismal immunity and social immunity could therefore lead to new  
444 insights about how disease defences evolve [17]. For example, the results of our study  
445 suggest that equivalent selection pressures can result in convergent defences that  
446 protect multicellular organisms and superorganismal insect societies from systemic  
447 disease spread. Future work that can link the performance of social immunity  
448 defences to colony fitness will therefore provide useful insights into how such traits  
449 are selected for over evolutionary time.

450

## 451 **Materials and Methods**

### 452 **Ant host**

453 We studied the unicolonial invasive garden ant, *Lasius neglectus*, collected in Seva,  
454 Spain (41.809000, 2.262194) [55]. Stock colonies were kept at a constant temperature  
455 of 23°C with 70% humidity and a day/night cycle of 14/10 h. All experiments were  
456 conducted in plastered petri dishes ( $\varnothing = 33, 55$  or 90 mm) with 10% sucrose solution  
457 provided *ad libitum* and environmental conditions were controlled throughout (23°C;  
458 70% RH; 14/10 h light/dark cycles). Care of animals was in accordance with  
459 institutional guidelines.

460

### 461 **Fungal pathogen**

462 As a model pathogen, we used the entomopathogenic fungus *Metarhizium brunneum*  
463 (strain MA275, KVL 03-143). Multiple aliquots were kept in long-term storage at –  
464 80°C. Prior to each experiment the conidiospores were grown on sabaroud dextrose  
465 agar at 23°C until sporulation and harvested by suspending them in 0.05% sterile  
466 Triton X-100 (Sigma). The germination rate of conidiospore suspensions was  
467 determined before the start of each experiment and was > 90% in all cases.

468

### 469 **Pupal pathogen exposure**

470 Conidiospores were applied in a suspension of 0.05% autoclaved Triton-X 100 at 10<sup>6</sup>  
471 conidia/ml in all experiments unless otherwise stated. Throughout the study, we used  
472 cocooned worker pupae of approximately the same age, which was determined by  
473 assessing the melanisation of the eyes and cuticle. Single pupae were exposed by  
474 gently rolling them in 1 µl of the conidiospore suspension using sterile soft forceps.  
475 Pupae were then allowed to air dry for 5-10 min before being used in experiments.  
476 This exposure procedure resulted in pupae receiving ~ 1800 conidiospores, of which  
477 5% (~ 95 conidiospore) passed through the cocoon and came into contact with the  
478 pupa inside (Fig S1).

479

### 480 **Statistical Analysis**

481 Statistical analyses were carried out in R version 3.3.2 [73]. All statistical tests were  
482 two-tailed. General(ised) linear and mixed models were compared to null (intercept  
483 only) and reduced models (for those with multiple predictors) using Likelihood Ratio  
484 (LR) tests to assess the significance of predictors [74]. We controlled for the number

485 of statistical tests performed per experiment to protect against a false discovery rate  
486 using the Benjamini-Hochberg procedure ( $\alpha = 0.05$ ). Moreover, all post hoc analyses  
487 were corrected for multiple testing using the Benjamini-Hochberg procedure ( $\alpha =$   
488  $0.05$ ) [75,76]. We checked the necessary assumptions of all tests i.e. by viewing  
489 histograms of data, plotting the distribution of model residuals, checking for non-  
490 proportional hazards, testing for unequal variances, testing for the presence of  
491 multicollinearity, testing for over-dispersion, and assessing models for instability and  
492 influential observations. For mixed effects modelling, we used the packages ‘lme4’ to  
493 fit models [77], ‘influence.ME’ to test assumptions [78], and, for LMERS, ‘lmerTest’  
494 to obtain  $P$  values [79]. All logistic regressions were performed using either  
495 generalised linear models (GLMs) or generalised linear mixed models (GLMMs),  
496 which had binomial error terms and logit-link function. The Cox proportional hazards  
497 regression was carried out using the ‘coxphf’ package with post hoc comparisons  
498 achieved by re-levelling the model and correcting the resulting  $P$  values [80]. For  
499 Kruskal-Wallis (KW) tests and subsequent post hoc comparisons we used the  
500 ‘agricolae’ package, which implements the Conover-Iman test for multiple  
501 comparisons using rank sums [81]. For the perMANOVA, we used the package  
502 ‘vegan’ and performed pairwise perMANOVAs for post hoc comparisons [82]. All  
503 other post hoc comparisons were performed using the ‘multcomp’ package [83].  
504 Finally, all graphs were made using the ‘ggplot2’ package [84]. Individual  
505 descriptions of statistical analyses are given for all experiments below.

506

### 507 **Unpacking behaviour**

508 To study how ants respond to infections, we exposed pupae to a low ( $10^4$ /ml),  
509 medium ( $10^6$ /ml) or high ( $10^9$ /ml) dose of conidiospores or autoclaved Triton X as a

510 sham control (sham control,  $n = 24$ ; all other treatments,  $n = 25$ ). The pupae were  
511 then placed into individual petri dishes with two ants and inspected hourly for 10 h/d  
512 for 10 d. When the ants unpacked a pupa, it was removed and surface-sterilised [85]  
513 to ensure that any fungal outgrowth was the result of internal infections and not  
514 residual conidiospores on the cuticle. After sterilisation, we transferred the pupae to a  
515 petri dish lined with damp filter paper at 23°C and monitored them for 2 weeks for  
516 *Metarhizium* sporulation to confirm the presence of an internal infection (low dose,  $n$   
517 = 8; medium dose,  $n = 18$ ; high,  $n = 21$ ). In addition, any cocooned pupae that were  
518 not unpacked after 10 d were removed from the ants, surface sterilised and observed  
519 for sporulation, as above (low dose,  $n = 11$ ; medium dose,  $n = 4$ ; high,  $n = 4$ ). We  
520 analysed the effect of treatment on unpacking using a Cox proportional hazards model  
521 with Firth's penalized likelihood, which offers a solution to the monotone likelihood  
522 caused by the complete absence of unpacking in the sham control treatment. We  
523 followed up this analysis with post hoc comparisons (model factor re-levelling) to test  
524 unpacking rates between treatments (Fig 1B). We compared the number of unpacked  
525 and cocooned pupae sporulating using a logistic regression, which included pupa type  
526 (cocooned, unpacked), conidiospore dose (low, medium, high) and their interaction as  
527 main effects. The interaction was non-significant (GLM: LR  $\chi^2 = 5.0$ ,  $df = 2$ ,  $P =$   
528 0.084); hence, it was removed to gain better estimates of the remaining predictors.

529

### 530 **Images and scanning electron micrographs (SEMs) of destructive disinfection**

531 Photographs of destructive disinfection were captured (Nikon D3200) and  
532 aesthetically edited (Adobe Photoshop) to demonstrate the different behaviours (Fig  
533 1A). They were not used in any form of data acquisition. We also made representative  
534 SEMs of a pupa directly after unpacking and one after destructive disinfection (24 h

535 after unpacking; Fig 1F-G). As the pupae were frozen at  $-80^{\circ}\text{C}$  until the SEMs were  
536 made, we also examined non-frozen pupae taken directly from the stock colony and  
537 confirmed that freezing itself does not cause damage to the pupa (not shown).

538

### 539 **Comparison of sanitary care and destructive disinfection behaviours**

540 To observe how the behavioural repertoire of the ants changes between sanitary care  
541 and destructive disinfection, we filmed three individually colour-marked ants tending  
542 a single pathogen-exposed pupa with a USB microscope camera (Di-Li ® 970-O). To  
543 characterise the sanitary care behaviours of the ants, we analysed the first 24 h of the  
544 videos following the introduction of the pupa. To study destructive disinfection  
545 behaviours, we analysed the 24 h period that immediately followed unpacking.

546 Videos were analysed using the behavioural-logging software JWatcher<sup>TM</sup> [86]. For  
547 each ant ( $n = 15$ ), we recorded the duration of its grooming bouts, the frequency of  
548 poison application and the frequency of biting. Grooming duration was analysed using  
549 a LMER, having first log-transformed the data to fulfil the assumption of normality  
550 (Fig 1C). The frequency of poison application and biting (Fig 1D-E) were analysed  
551 using separate GLMMs with Poisson error terms for count data and logit-link  
552 function. We included an observation-level random intercept effect to account for  
553 over-dispersion in the data [87]. In all three models, we included petri dish identity as  
554 a random intercept effect because ants from the same dish are non-independent.  
555 Additionally, a random intercept effect was included for each ant as we observed the  
556 same individuals twice (before and after unpacking).

557

### 558 **Chemical bioassay**



559 We determined whether ants detect infected pupae through potential changes in the  
560 pupae's cuticular chemical profile. We established internal infections in pupae by  
561 exposing them to the pathogen and leaving them for 3 d in isolation. In pilot studies,  
562 approx. 50% of these pupae were then unpacked within 4 h of being introduced to  
563 ants. After 3 d, pupae were washed for 2.5 min in 300  $\mu$ l of either pentane solvent to  
564 reduce the abundance of all CHCs present on the pupae ( $n = 28$ ), or in autoclaved  
565 water as a handling control ( $n = 28$ ). After washing, pupae were allowed to air dry on  
566 sterile filter paper. Additionally, non-washed pupae were used as a positive control ( $n$   
567 = 30). Pupae were placed individually with a pair of ants in petri dishes and observed  
568 for unpacking for 4 h. We used GC–MS (see below for methodology) to confirm that  
569 washing was effective at removing cuticular compounds, by comparing the total  
570 amount of chemicals present on pupae washed in pentane to non- and water-washed  
571 pupae ( $n = 8$  per treatment; Fig S4). The number of pupae unpacked between the  
572 different treatments was analysed using a logistic regression (Fig 2A). As several  
573 researchers helped to wash the pupae, we included a random intercept for each person  
574 to control for any potential handling effects. Additionally, the experiment was run in  
575 two blocks on separate days, so we included a random intercept for each block to  
576 generalise beyond any potential differences between runs. The total peak area from  
577 the GC–MS analysis was compared between treatments using a KW test with post hoc  
578 comparisons.

579

### 580 **Chemical analysis of pupal hydrocarbon patterns**

581 To confirm that infected pupae had chemical profiles that are different from pathogen-  
582 exposed cocooned and control pupae, we exposed pupae to the pathogen or a sham  
583 control. Pupae were then isolated for 3 d to establish infections in the pathogen-

584 exposed treatment (as above). Following isolation, pupae were individually placed  
585 with ants and observed for unpacking for 4 h. Unpacked pupae were immediately  
586 frozen at  $-80^{\circ}\text{C}$  with the removed cocoons ( $n = 13$ ) and we also froze cocooned  
587 pathogen-exposed pupa that had not yet been unpacked ( $n = 10$ ). Furthermore, we  
588 froze a pair of control pupae, of which one was cocooned ( $n = 12$ ), whilst the other  
589 was first experimentally unpacked (to test if the cocoon affects cuticular compound  
590 extraction;  $n = 12$ ). Cuticular chemicals were extracted from individual pupae and  
591 their cocoons in glass vials (Supelco; 1.8 ml) containing 100  $\mu\text{l}$  n-pentane solvent for  
592 5 min under gentle agitation. The vials were then centrifuged at 3000 rpm for 1 min to  
593 spin down any fungal conidiospores that might be remaining, and 80  $\mu\text{l}$  of the  
594 supernatant was transferred to fresh vials with 200  $\mu\text{l}$  glass inserts and sealed with  
595 Teflon faced silicon septa (both Supelco). The pentane solvent contained four internal  
596 standards relevant for our range of hydrocarbons ( $\text{C}_{27} - \text{C}_{37}$ ); n-Tetracosane, n-  
597 Triacontane, n-Dotriacontane and n-Hexatriacontane (Sigma Aldrich) at 0.5  $\mu\text{g}/\text{ml}$   
598 concentration, all fully deuterated to enable spectral traceability and separation of  
599 internal standards from ant-derived substances. We ran extracts from the different  
600 groups in a randomised manner, intermingled with blank runs containing only  
601 pentane, and negative controls containing the pentane plus internal standards (to  
602 exclude contaminants emerging e.g. from column bleeding), on the day of extraction,  
603 using GC-MS (Agilent Technologies; GC7890 coupled to MS5975C).

604

605 A liner with one restriction ring filled with borosilicate wool (Joint Analytical  
606 Systems) was installed in the programmed temperature vaporisation (PTV) injection  
607 port of the GC, which was pre-cooled to  $-20^{\circ}\text{C}$  and set to solvent vent mode. 50  $\mu\text{l}$  of  
608 the sample extractions were injected automatically into the PTV port at 40  $\mu\text{l}/\text{s}$  using

609 an autosampler (CTC Analytics, PAL COMBI-xt; Axel Semrau, CHRONOS 4.2  
610 software) equipped with a 100 µl syringe (Hamilton). Immediately after injection, the  
611 PTV port was ramped to 300 °C at 450 °C/min, and the sample transferred to the  
612 column (DB-5ms; 30 m × 0.25 mm, 0.25 µm film thickness) at a flow of 1 ml/min.  
613 The oven temperature program was held at 35 °C for 4.5 min, then ramped to 325 °C  
614 at 20 °C/min, and held at this temperature for 11 min. Helium was used as the carrier  
615 gas at a constant flow rate of 3 ml/min. For all samples, the MS transfer line was set  
616 to 325 °C, and the MS operated in electron ionisation mode (70 eV; ion source 230  
617 °C; quadrupole 150 °C, mass scan range 35-600 amu, with a detection threshold of  
618 150). Data acquisition was carried out using MassHunter Workstation, Data  
619 Acquisition software B.07.01 (Agilent Technologies).

620

621 Analytes were detected by applying deconvolution algorithms to the total ion  
622 chromatograms of the samples (MassHunter Workstation, Qualitative Analysis  
623 B.07.00). Compound identification (Table S1) was performed via manual  
624 interpretation using retention indices and spectral information, and the comparison of  
625 mass spectra to the Wiley 9<sup>th</sup> edition/NIST 11 combined mass spectral database  
626 (National Institute of Standards and Technologies). As the molecular ion was not  
627 detectable for all analytes based on electronic ionisation, we in addition performed  
628 chemical ionisation on pools of 20 pupae in 100 µl n-pentane solvent with 0.5 µg/ml  
629 internal standards. The higher extract concentration was needed to counteract the loss  
630 in ionisation efficiency in chemical ionisation mode. A specialised chemical  
631 ionisation source with methane as the reagent gas was used with the MS, while the  
632 chromatographic method was the same as in electronic ionisation mode. Use of  
633 external standards (C<sub>7</sub>-C<sub>40</sub> saturated alkane mixture [Sigma Aldrich]) enabled

634 traceability of all peaks, and thus comparison to runs of single pupae extracts made in  
635 electronic ionisation mode. Modified Kovats retention indices for the peaks in  
636 question were calculated based on those standards. To further aid identification, we  
637 separated the substances based on polarity using solid phase extraction fractionation.  
638 For this purpose, pools of 20 pupae were extracted in 500 µl n-pentane containing 0.2  
639 µg/ml internal standard, and separated on unmodified silica cartridges (Chromabond  
640 ® SiOH, 1ml, 100 mg) based on polarity. Prior to use, the cartridges were conditioned  
641 with 1 ml dichloromethane followed by 1 ml n-pentane. The entire extraction volume  
642 was loaded onto the silica and the eluent (fraction 1, highly apolar phase) collected. A  
643 wash with 1 ml pure n-pentane was added to fraction 1. Fraction 2 contained all  
644 substances washed off the silica with 1 ml 25 % dichloromethane in n-pentane, and  
645 finally a pure wash with 1 ml dichloromethane eluted all remaining substances  
646 (fraction 3). The polarity thus increased from fraction 1 through 3, but no polar  
647 substances were found. All fractions were dried under a gentle nitrogen stream and re-  
648 suspended in 70 µl n-pentane followed by vigorous vortexing for 45 s. GC-MS  
649 analysis of all fractions was performed in electronic ionisation mode under the same  
650 chromatographic conditions as before.

651

652 To quantify the relative abundances of all compounds found on each pupa, analyte-  
653 characteristic quantifier and qualifier ions were used to establish a method enabling  
654 automatized quantification of their integrated peak area relative to the peak area of the  
655 closest internal standard. For each analyte, the relative peak area was normalised, i.e.  
656 divided by the total sum of all relative peak areas of one pupa, to standardise all pupa  
657 samples. Only analytes, which normalised peak area contributed more than 0.05% of  
658 the total peak area, were included in the statistical analysis. We compared the

659 chemical profiles of the pupae using a perMANOVA analysis of the Mahalanobis  
660 dissimilarities between pupae, with post hoc perMANOVA comparisons. Since there  
661 was no difference between cocooned and unpacked control pupae we combined them  
662 into a single control group for the final analysis (perMANOVA:  $F = 1.09$ ,  $df = 23$ ,  $P$   
663  $= 0.1$ ). We also performed a discriminant analysis of principle components (Fig 2B)  
664 to characterise the differences between the pupal treatments [88,89]. To identify the  
665 compounds that differ between treatments, we performed a conditional random forest  
666 classification ( $n$  trees = 500,  $n$  variables per split = 4) [88,90,91]. Random forest  
667 identified 9 compounds that were important in classifying the treatment group, of  
668 which 8 were significant when analysed using separate KW tests (results for  
669 significant compounds in Table S2). We followed up the KW tests with individual  
670 post hoc comparisons for each significant compound (Fig 2C-F, post hoc comparisons  
671 in Table S2).

672

### 673 **Effect of destructive disinfection on pathogen replication**

674 To test if destructive disinfection prevents *Metarhizium* from successfully replicating,  
675 we kept single pathogen-exposed pupae in petri dishes containing groups of 3 or 8  
676 ants. This allowed us to assess how group size affects the likelihood of fungal  
677 inhibition. For the following 10 d, we observed the pupae for unpacking. When a  
678 pupa was unpacked, we left it with the ants for a further 1 or 5 d so that they could  
679 perform destructive disinfection. This allowed us to assess how the duration of  
680 destructive disinfection affects the likelihood of fungal inhibition. The destructively  
681 disinfected pupae were then removed and placed into petri dishes on damp filter paper  
682 at 23 °C (8 ants 1 d and 5 d,  $n = 22$  pupae each; 3 ants 1 and 5 d,  $n = 18$  pupae each).  
683 We did not surface sterilise the pupae as this might have interfered with the

684 destructive disinfection the ants had performed. Removed pupae were observed daily  
685 for *Metarhizium* sporulation for 30 d. To determine how many pupae sporulate in the  
686 absence of destructive disinfection, we kept pathogen-exposed pupae without ants as a  
687 control and recorded the number that sporulated for 30 d ( $n = 25$ ). We compared the  
688 number of pupae that sporulated after 1 d, 5 d and in the absence of ants using logistic  
689 regressions and Tukey post hoc comparisons, separately for the two ant group sizes  
690 (Fig 3A, Fig S6).

691

### 692 ***In vitro* investigation of destructive disinfection**

693 We examined the individual effects of unpacking, biting and poison application on  
694 destructive disinfection by performing these behaviours *in vitro*. Pathogen-exposed  
695 pupae were initially kept with ants so that they could perform sanitary care. After 3 d,  
696 we removed the pupae and split them up into three groups: (i) pupae that we left  
697 cocooned, (ii) experimentally unpacked and (iii) experimentally unpacked and bitten.  
698 We simulated the damage the ants achieve through biting by damaging the pupal  
699 cuticle and removing their limbs with forceps. The pupae were then treated with either  
700 synthetic ant poison (60% formic acid and 2% acetic acid, in water; applied at a dose  
701 equivalent to what ants apply during destructive disinfection; Fig S8) or autoclaved  
702 distilled water as a control, using pressurised spray bottles (Lacor) to evenly coat the  
703 pupae in liquid. The pupae were allowed to air dry for 5 min before being rolled over  
704 and sprayed again and allowed to dry a further 5 min. All pupae were then placed into  
705 separate petri dishes and monitored daily for *Metarhizium* sporulation (cocooned +  
706 poison,  $n = 24$ ; unpacked + poison + biting,  $n = 24$ ; all other treatments,  $n = 25$ ). The  
707 number of pupae sporulating was analysed using a logistic regression with Firth's  
708 penalised likelihood, which offers a solution to the monotone likelihood caused by the

709 complete absence of sporulation in one of the groups (R package ‘brglm’ [92]). Pupal  
710 manipulation (cocooned/unpacked only/unpacked and bitten), chemical treatment  
711 (water or poison) and their interaction were included as main effects (Fig 3B, Fig S7).  
712 We followed up this analysis with Tukey post hoc comparisons (Table S3).

713

#### 714 **Disease transmission from infectious and destructively disinfected pupae**

715 We tested the impact of destructive disinfection on disease transmission within groups  
716 of ants by keeping them with sporulating pupae or pupae that had been destructively  
717 disinfected. Infections were established in pupae (as above) and half were allowed to  
718 sporulate ( $n = 11$ ), whilst the other half were experimentally destructively disinfected  
719 (as above;  $n = 11$ ). Pupae were then kept individually with groups of 5 ants in mini-  
720 nests (cylindrical containers [ $\varnothing = 90$  mm] with a second, smaller chamber covered in  
721 red foil [ $\varnothing = 33$  mm]). Ant mortality was monitored daily for 30 d. Dead ants were  
722 removed, surface sterilised and observed for *Metarhizium* sporulation. The number of  
723 ants dying from *Metarhizium* infections in each treatment was compared using a  
724 logistic regression (Fig 4A). Mini-nest identity was included as a random intercept  
725 effect as ants from the same group are non-independent.

726

#### 727 **Acknowledgments**

728 We thank L. Lovicar for producing SEMs, B. Leyrer for help with chemical analysis,  
729 B. Milutinović and M. Bračić for assistance with the chemical bioassay and the *Social*  
730 *Immunity* group at IST Austria for ant collections and comments on earlier drafts of  
731 the manuscript. Finally, we are grateful to M. Sixt, D. Siekhaus and J. J. Boomsma for  
732 discussion of the project throughout.

733

734 **Funding statement**

735 This study received funding from the European Research Council under the European  
736 Union's Seventh Framework Programme (FP7/2007-2013)/ERC grant agreement n°  
737 243071 to S.C. and the People Programme (Marie Curie Actions) of the European  
738 Union's Seventh Framework Programme (FP7/2007-2013) under REA grant  
739 agreement n° 302004 to L.V.U.

740

741 **Competing financial interests**

742 The authors declare no competing financial interests.

743

744

745 **References**

- 746 1. Schmid-Hempel P. Evolutionary parasitology: the integrated study of  
747 infections, immunology, ecology, and genetics. New York: Oxford University  
748 Press; 2011.
- 749 2. Nunn CL, Altizer S. Infectious diseases in primates: behavior, ecology and  
750 evolution. New York: Oxford University Press; 2006.
- 751 3. Schmid-Hempel P. Parasites and their social hosts. Trends Parasitol. 2017;  
752 doi:10.1016/j.pt.2017.01.003
- 753 4. Alexander RD. The evolution of social behavior. Annu Rev Ecol Syst. 1974;5:  
754 325–383. doi:10.1146/annurev.es.05.110174.001545
- 755 5. Hamilton WD. Kinship, recognition, disease, and intelligence: constraints of  
756 social evolution. In: Ito Y, Brown J, Kikkawa J, editors. Animal societies:  
757 theories and facts. Tokyo: Japan Sci. Soc. Press; 1987. pp. 81–102.
- 758 6. Ezenwa VO, Ghai RR, McKay AF, Williams AE. Group living and pathogen



- 759 infection revisited. *Curr Opin Behav Sci.* 2016;12: 66–72.  
760 doi:10.1016/j.cobeha.2016.09.006
- 761 7. Queller DC, Strassmann JE. Eusociality. *Curr Biol.* 2003;13: R861–R863.  
762 doi:10.1016/j.cub.2003.10.043
- 763 8. Bourke AFG. Principles of social evolution. Oxford: Oxford University Press;  
764 2011.
- 765 9. West SA, Fisher RM, Gardner A, Toby Kiers E. Major evolutionary transitions  
766 in individuality. *Proc Natl Acad Sci.* 2015;112: 10112–10119.  
767 doi:10.1073/pnas.1421402112
- 768 10. Wheeler WM. The ant-colony as an organism. *J Morphol.* 1911;22: 307–325.  
769 doi:10.1002/jmor.1050220206
- 770 11. Boomsma JJ, Gawne R. Superorganismality and caste differentiation as points  
771 of no return: how the major evolutionary transitions were lost in translation.  
772 *Biol Rev.* 2017;Forthcoming.
- 773 12. Cremer S, Armitage SAO, Schmid-Hempel P. Social immunity. *Curr Biol.*  
774 2007;17: 693–702. doi:10.1016/j.cub.2007.06.008
- 775 13. Shorter JR, Rueppell O. A review on self-destructive defense behaviors in  
776 social insects. *Insectes Soc.* 2011;59: 1–10. doi:10.1007/s00040-011-0210-x
- 777 14. Stroeymeyt N, Casillas-Pérez B, Cremer S. Organisational immunity in social  
778 insects. *Curr Opin Insect Sci.* 2014;5: 1–15. doi:10.1016/j.cois.2014.09.001
- 779 15. Wilson-Rich N, Spivak M, Fefferman NH, Starks PT. Genetic, individual, and  
780 group facilitation of disease resistance in insect societies. *Annu Rev Entomol.*  
781 2009;54: 405–23. doi:10.1146/annurev.ento.53.103106.093301
- 782 16. Meunier J. Social immunity and the evolution of group living in insects. *Philos*  
783 *Trans R Soc B Biol Sci.* 2015;370: 20140102. doi:10.1098/rstb.2014.0102

- 784 17. Cremer S, Sixt M. Analogies in the evolution of individual and social  
785 immunity. *Philos Trans R Soc London B Biol Sci.* 2009;364: 129–42.  
786 doi:10.1098/rstb.2008.0166
- 787 18. Tranter C, LeFevre L, Evison SEF, Hughes WOH. Threat detection: contextual  
788 recognition and response to parasites by ants. *Behav Ecol.* 2015;26: 396–405.  
789 doi:10.1093/beheco/aru203
- 790 19. Rosengaus R, Traniello JFA. Disease susceptibility and the adaptive nature of  
791 colony demography in the dampwood termite *Zootermopsis angusticollis*.  
792 *Behav Ecol Sociobiol.* 2001;50: 546–556. doi:10.1007/s002650100394
- 793 20. Reber A, Purcell J, Buechel SD, Buri P, Chapuisat M. The expression and  
794 impact of antifungal grooming in ants. *J Evol Biol.* 2011;24: 954–64.  
795 doi:10.1111/j.1420-9101.2011.02230.x
- 796 21. Graystock P, Hughes WOH. Disease resistance in a weaver ant, *Polyrhachis*  
797 *dives*, and the role of antibiotic-producing glands. *Behav Ecol Sociobiol.*  
798 2011;65: 2319–2327. doi:10.1007/s00265-011-1242-y
- 799 22. Tragust S, Mitteregger B, Barone V, Konrad M, Ugelvig L V, Cremer S. Ants  
800 disinfect fungus-exposed brood by oral uptake and spread of their poison. *Curr*  
801 *Biol.* 2013;23: 76–82. doi:10.1016/j.cub.2012.11.034
- 802 23. Hughes WOH, Eilenberg J, Boomsma JJ. Trade-offs in group living:  
803 transmission and disease resistance in leaf-cutting ants. *Proc Biol Sci B Biol*  
804 *Sci.* 2002;269: 1811–1819. doi:10.1098/rspb.2002.2113
- 805 24. Loreto RG, Hughes DP. Disease in the society: infectious cadavers result in  
806 collapse of ant sub-colonies. *PLoS One.* 2016;11: e0160820.  
807 doi:10.1371/journal.pone.0160820
- 808 25. Deacon JW. *Fungal Biology*. Malden: Blackwell Publishing; 2006.

- 809 26. Ugelvig L V, Kronauer DJC, Schrempf A, Heinze J, Cremer S. Rapid anti-  
810 pathogen response in ant societies relies on high genetic diversity. Proc R Soc  
811 B. 2010;277: 2821–2828. doi:10.1098/rspb.2010.0644
- 812 27. Tragust S, Ugelvig L V, Chapuisat M, Heinze J, Cremer S. Pupal cocoons  
813 affect sanitary brood care and limit fungal infections in ant colonies. BMC  
814 Evol Biol. 2013;13: 225. doi:10.1186/1471-2148-13-225
- 815 28. Okuno M, Tsuji K, Sato H, Fujisaki K. Plasticity of grooming behavior against  
816 entomopathogenic fungus *Metarhizium anisopliae* in the ant *Lasius japonicus*.  
817 J Ethol. 2011;30: 23–27. doi:10.1007/s10164-011-0285-x
- 818 29. Leonhardt SD, Menzel F, Nehring V, Schmitt T. Ecology and evolution of  
819 communication in social insects. Cell. 2016;164: 1277–1287.  
820 doi:10.1016/j.cell.2016.01.035
- 821 30. Theraulaz G, Bonabeau E, Deneubourg J. Response threshold reinforcements  
822 and division of labour in insect societies. Proc R Soc B Biol Sci. 1998;265:  
823 327–332. doi:10.1098/rspb.1998.0299
- 824 31. Beshers SN, Fewell JH. Models of division of labor in social insects. Annu Rev  
825 Entomol. 2001;46: 413–440. doi:10.1146/annurev.ento.46.1.413
- 826 32. Sharma KR, Enzmann BL, Schmidt Y, Moore D, Jones GR, Parker J, *et al.*  
827 Cuticular hydrocarbon pheromones for social behavior and their coding in the  
828 ant antenna. Cell Rep. 2015; 1–11. doi:10.1016/j.celrep.2015.07.031
- 829 33. Hefetz A, Blum MS. Biosynthesis of formic acid by the poison glands of  
830 formicine ants. Biochim Biophys Acta. 1978;543: 484–496. doi:10.1016/0304-  
831 4165(78)90303-3
- 832 34. Walch M, Dotiwala F, Mulik S, Thiery J, Kirchhausen T, Clayberger C, *et al.*  
833 Cytotoxic cells kill intracellular bacteria through granulysin-mediated delivery

- 834 of granzymes. *Cell*. 2014;157: 1309–1323. doi:10.1016/j.cell.2014.03.062
- 835 35. Kägi D, Ledermann B, Bürki K, Seiler P, Odermatt B, Olsen KJ, *et al.*
- 836 Cytotoxicity mediated by T cells and natural killer cells is greatly impaired in
- 837 perforin-deficient mice. *Nature*. 1994;369: 31–37. doi:10.1038/369031a0
- 838 36. Chowdhury D, Lieberman J. Death by a thousand cuts: granzyme pathways of
- 839 programmed cell death. *Annu Rev Immunol*. 2008;26: 389–420.
- 840 doi:10.1146/annurev.immunol.26.021607.090404
- 841 37. Shore SL, Cromeans TL, Romano TJ. Immune destruction of virus-infected
- 842 cells early in the infectious cycle. *Nature*. 1976;262: 695–696.
- 843 doi:10.1038/262695a0
- 844 38. Leclerc J-B, Detrain C. Ants detect but do not discriminate diseased workers
- 845 within their nest. *Sci Nat*. 2016;103: 70. doi:10.1007/s00114-016-1394-8
- 846 39. Bos N, Lefèvre T, Jensen AB, D’Ettorre P. Sick ants become unsociable. *J*
- 847 *Evol Biol*. 2012;25: 342–51. doi:10.1111/j.1420-9101.2011.02425.x
- 848 40. Diez L, Moquet L, Detrain C. Post-mortem changes in chemical profile and
- 849 their influence on corpse removal in ants. *J Chem Ecol*. 2013;39: 1424–1432.
- 850 doi:10.1007/s10886-013-0365-1
- 851 41. Qiu H-L, Lu L-H, Shi Q-X, Tu C-C, Lin T, He Y-R. Differential necrophoric
- 852 behaviour of the ant *Solenopsis invicta* towards fungal-infected corpses of
- 853 workers and pupae. *Bull Entomol Res*. 2015;105: 607–614.
- 854 doi:10.1017/S0007485315000528
- 855 42. Wilson EO, Durlach NI, Roth LM. Chemical releaser of necrophoric behavior
- 856 in ants. *Psyche*. 1958;65: 108–114. doi:10.1155/1958/69391
- 857 43. Trabalon M, Plateaux L, Péru L, Bagnères A-G, Hartmann N. Modification of
- 858 morphological characters and cuticular compounds in worker ants *Leptothorax*

- 859 *nylanderi* induced by endoparasites *Anomotaenia brevis*. J Insect Physiol.  
860 2000;46: 169–178. doi:10.1016/S0022-1910(99)00113-4
- 861 44. Lin L, Fang W, Liao X, Wang F, Wei D, St. Leger RJ. The MrCYP52  
862 cytochrome P450 monooxygenase gene of *Metarhizium robertsii* is important  
863 for utilizing insect epicuticular hydrocarbons. PLoS One. 2011;6: e28984.  
864 doi:10.1371/journal.pone.0028984
- 865 45. Richard F-J, Aubert A, Grozinger C. Modulation of social interactions by  
866 immune stimulation in honey bee, *Apis mellifera*, workers. BMC Biol. 2008;6:  
867 50. doi:10.1186/1741-7007-6-50
- 868 46. Richard F-J, Holt HL, Grozinger CM. Effects of immunostimulation on social  
869 behavior, chemical communication and genome-wide gene expression in honey  
870 bee workers (*Apis mellifera*). BMC Genomics. 2012;13: 558.  
871 doi:10.1186/1471-2164-13-558
- 872 47. Baracchi D, Fadda A, Turillazzi S. Evidence for antiseptic behaviour towards  
873 sick adult bees in honey bee colonies. J Insect Physiol. 2012;58: 1589–1596.  
874 doi:10.1016/j.jinsphys.2012.09.014
- 875 48. Shakhar K, Shakhar G. Why do we feel sick when infected—can altruism play  
876 a role? PLoS Biol. 2015;13: e1002276. doi:10.1371/journal.pbio.1002276
- 877 49. Ravichandran KS. Find-me and eat-me signals in apoptotic cell clearance:  
878 progress and conundrums. J Exp Med. 2010;207: 1807–1817.  
879 doi:10.1084/jem.20101157
- 880 50. Grimsley C, Ravichandran KS. Cues for apoptotic cell engulfment: eat-me,  
881 don't eat-me and come-get-me signals. Trends Cell Biol. 2003;13: 648–656.  
882 doi:10.1016/j.tcb.2003.10.004
- 883 51. Tragust S. External immune defence in ant societies (Hymenoptera:

- 884 Formicidae): the role of antimicrobial venom and metapleural gland secretion.  
885 Myrmecol news. 2016;23: 119–128.
- 886 52. Knaden M, Wehner R. Nest defense and conspecific enemy recognition in the  
887 desert ant *Cataglyphis fortis*. J Insect Behav. 2003;16: 717–730.  
888 doi:10.1023/B:JOIR.0000007706.38674.73
- 889 53. Reber A, Chapuisat M. Diversity, prevalence and virulence of fungal  
890 entomopathogens in colonies of the ant *Formica selysi*. Insectes Soc. 2012;59:  
891 231–239. doi:10.1007/s00040-011-0209-3
- 892 54. Hughes WOH, Thomsen L, Eilenberg J, Boomsma JJ. Diversity of  
893 entomopathogenic fungi near leaf-cutting ant nests in a neotropical forest, with  
894 particular reference to *Metarhizium anisopliae* var. *anisopliae*. J Invertebr  
895 Pathol. 2004;85: 46–53. doi:10.1016/j.jip.2003.12.005
- 896 55. Cremer S, Ugelvig L V, Drijfhout FP, Schlick-Steiner BC, Steiner FM, Seifert  
897 B, *et al.* The evolution of invasiveness in garden ants. PLoS One. 2008;3:  
898 e3838. doi:10.1371/journal.pone.0003838
- 899 56. Keller S, Kessler P, Schweizer C. Distribution of insect pathogenic soil fungi in  
900 Switzerland with special reference to *Beauveria brongniartii* and *Metharhizium*  
901 *anisopliae*. BioControl. 2003;48: 307–319. doi:10.1023/A:1023646207455
- 902 57. Roberts DW, St. Leger RJ. *Metarhizium* spp., cosmopolitan insect-pathogenic  
903 fungi: mycological aspects. Adv Appl Microbiol. 2004. pp. 1–70.  
904 doi:10.1016/S0065-2164(04)54001-7
- 905 58. Shimazu M. *Metarhizium cylindrospora* Chen et Guo (Deuteromycotina:  
906 Hyphomycetes), the causative agent of an epizootic on *Graptopsaltria*  
907 *nigrofusca* Motchulski (Homoptera: Cicadidae). Appl Entomol Zool. 1989;24:  
908 430–434. doi:10.1303/aez.24.430

- 909 59. Lomer CJ, Prior C, Kooyman C. Development of *Metarhizium* spp. for the  
910 control of grasshoppers and locusts. Mem Entomol Soc Canada. 1997;129:  
911 265–286. doi:10.4039/entm129171265-1
- 912 60. Hughes DP, Araújo J, Loreto R, Quevillon L, de Bekker C, Evans HC. From so  
913 simple a beginning: the evolution of behavioral manipulation by fungi. Adv  
914 Genet. 2016;94: 1–33. doi:10.1016/bs.adgen.2016.01.004
- 915 61. Loreto RG, Elliot SL, Freitas MLR, Pereira TM, Hughes DP. Long-term  
916 disease dynamics for a specialized parasite of ant societies: a field study. PLoS  
917 One. 2014;9: e103516. doi:10.1371/journal.pone.0103516
- 918 62. Małagocka J, Jensen AB, Eilenberg J. *Pandora formicae*, a specialist ant  
919 pathogenic fungus: new insights into biology and taxonomy. J Invertebr Pathol.  
920 2017;143: 108–114. doi:10.1016/j.jip.2016.12.007
- 921 63. Agosta SJ, Janz N, Brooks DR. How specialists can be generalists: resolving  
922 the “parasite paradox” and implications for emerging infectious disease.  
923 Zoologia. 2010;27: 151–162. doi:10.1590/S1984-46702010000200001
- 924 64. Verza SS, Diniz EA, Chiarelli MF, Mussury RM, Bueno OC. Waste of leaf-  
925 cutting ants: disposal, nest structure, and abiotic soil factors around internal  
926 waste chambers. Acta Ethol.; 2017; doi:10.1007/s10211-017-0255-6
- 927 65. Hart AG, Ratnieks FLW. Waste management in the leaf-cutting ant *Atta*  
928 *colombica*. Behav Ecol. 2002;13: 224–231. doi:10.1093/beheco/13.2.224
- 929 66. Farji-Brener AG, Elizalde L, Fernández-Marín H, Amador-Vargas S. Social  
930 life and sanitary risks: evolutionary and current ecological conditions  
931 determine waste management in leaf-cutting ants. Proc R Soc B Biol Sci.  
932 2016;283: 20160625. doi:10.1098/rspb.2016.0625
- 933 67. Spivak M, REuter GS. Resistance to American foulbrood disease by honey bee

- 934 colonies *Apis mellifera* bred for hygienic behavior. *Apidologie*. 2001;32: 555–  
935 565. doi:10.1051/apido:2001103
- 936 68. Chouvenc T, Su N-Y. When subterranean termites challenge the rules of fungal  
937 epizootics. *PLoS One*. 2012;7: e34484. doi:10.1371/journal.pone.0034484
- 938 69. Chouvenc T, Su N-Y, Robert A. Inhibition of *Metarhizium anisopliae* in the  
939 alimentary tract of the eastern subterranean termite *Reticulitermes flavipes*. *J*  
940 *Invertebr Pathol*. 2009;101: 130–6. doi:10.1016/j.jip.2009.04.005
- 941 70. Rosengaus RB, Schultheis KF, Yalonetskaya A, Bulmer MS, DuComb WS,  
942 Benson RW, *et al*. Symbiont-derived  $\beta$ -1,3-glucanases in a social insect:  
943 mutualism beyond nutrition. *Front Microbiol*. 2014;5: 1–11.  
944 doi:10.3389/fmicb.2014.00607
- 945 71. Rosengaus R, Guldin M, Traniello JFA. Inhibitory effect of termite fecal  
946 pellets on fungal spore germination. *J Chem Ecol*. 1998;24: 1697–1706.  
947 doi:10.1023/A:1020872729671
- 948 72. Rosengaus RB, Traniello JFA, Bulmer MS. Ecology, behavior and evolution of  
949 disease resistance in termites. In: Bignell DE, Roisin Y, Lo N, editors. *Biology*  
950 *of termites: a modern synthesis*. New York: Springer; 2011. pp. 165–191.
- 951 73. R Core Team. *R: A language and environment for statistical computing*.  
952 Vienna, Austria: R Foundation for Statistical Computing; 2012.
- 953 74. Bolker BM, Brooks ME, Clark CJ, Geange SW, Poulsen JR, Stevens MHH, *et*  
954 *al*. Generalized linear mixed models: a practical guide for ecology and  
955 evolution. *Trends Ecol Evol*. 2009;24: 127–35. doi:10.1016/j.tree.2008.10.008
- 956 75. Benjamini Y, Hochberg Y. Controlling the false discovery rate: a practical and  
957 powerful approach to multiple testing. *J R Stat Soc*. 1995;57: 289–300.  
958 doi:10.2307/2346101



- 959 76. García L V. Escaping the Bonferroni iron claw in ecological studies. *Oikos*.  
960 2004;105: 657–663. doi:10.1111/j.0030-1299.2004.13046.x
- 961 77. Bates D, Maechler M, Bolker B, Walker S. lme4: linear mixed-effects models  
962 using Eigen and S4. R Foundation for Statistical Computing; 2014.
- 963 78. Nieuwenhuis R, Pelzer B, te Grotenhuis M. influence.ME: tools for detecting  
964 influential data in mixed effects models. *R J*. 2012;4: 38–47.
- 965 79. Kuznetsova, Alexandra, Brockhoff PB, Christensen RHB. lmerTest: tests in  
966 linear mixed effects models. R Foundation for Statistical Computing; 2015.
- 967 80. Ploner M, Heinze G. coxphf: Cox regression with Firth’s penalized likelihood.  
968 R Foundation for Statistical Computing; 2015.
- 969 81. de Mendiburu F. agricolae: statistical procedures for agricultural research. R  
970 Foundation for Statistical Computing; 2016.
- 971 82. Oksanen J, Blanchet FG, Kindt R, Legendre P, Minchin PR, O’Hara B, *et al*.  
972 vegan: community ecology package. R Foundation for Statistical Computing;  
973 2016.
- 974 83. Bretz F, Hothorn T, Westfall P. Multiple comparisons using R. Boca Ration:  
975 CRC Press; 2011.
- 976 84. Wickham H. ggplot2: elegant graphics for data analysis. New York: Springer;  
977 2009.
- 978 85. Lacey LA, Brooks WM. Initial handling and diagnosis of diseased  
979 invertebrates. In: Lacey LA, editor. Manual of techniques in invertebrate  
980 pathology. San Diego: Academic Press; 1997. p. 5.
- 981 86. Blumstein DT, Daniel JC. Quantifying behavior the JWatcher way.  
982 Sunderland: Sinauer Associates; 2007.
- 983 87. Harrison XA. Using observation-level random effects to model overdispersion

- 984 in count data in ecology and evolution. *PeerJ*. 2014;2: e616.  
985 doi:10.7717/peerj.616
- 986 88. De Moraes CM, Stanczyk NM, Betz HS, Pulido H, Sim DG, Read AF, *et al.*  
987 Malaria-induced changes in host odors enhance mosquito attraction. *Proc Natl*  
988 *Acad Sci*. 2014;111: 11079–11084. doi:10.1073/pnas.1405617111
- 989 89. Jombart T, Devillard S, Balloux F. Discriminant analysis of principal  
990 components: a new method for the analysis of genetically structured  
991 populations. *BMC Genet*. 2010;11: 94. doi:10.1186/1471-2156-11-94
- 992 90. Strobl C, Hothorn T, Zeileis A. Party on! *R J*. 2009;1: 14–17.
- 993 91. Strobl C, Malley J, Tutz G. An introduction to recursive partitioning: rationale,  
994 application, and characteristics of classification and regression trees, bagging,  
995 and random forests. *Psychol Methods*. 2009;14: 323–348.  
996 doi:10.1037/a0016973
- 997 92. Kosmidis I. *brglm*: Bias reduction in binomial-response generalized linear  
998 models. R Foundation for Statistical Computing; 2013.  
999
